# Supplementary material for: Polymorphisms ofNFκB1andIκBαand Their Synergistic Effect on Nasopharyngeal Carcinoma Susceptibility
Source: Hindawi journal article supplement (doi:10.1155/2015/362542), 2015-01-01
Supplement: f1 [file 362542.f1.pdf]

Figure S1

**A.**

*NFκB1* rs28362491 del/ins genotype

*NFκB2* rs12769316 G>A genotype

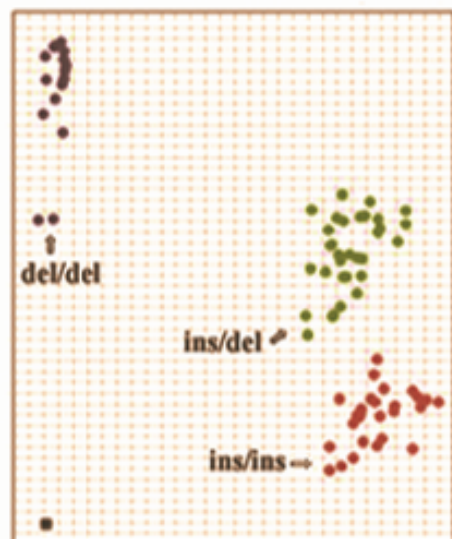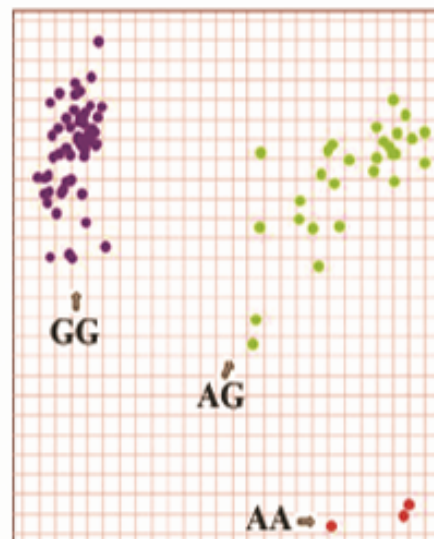

*IκBα* rs2233406 C>T genotype

*IκBα* rs696 G>A genotype

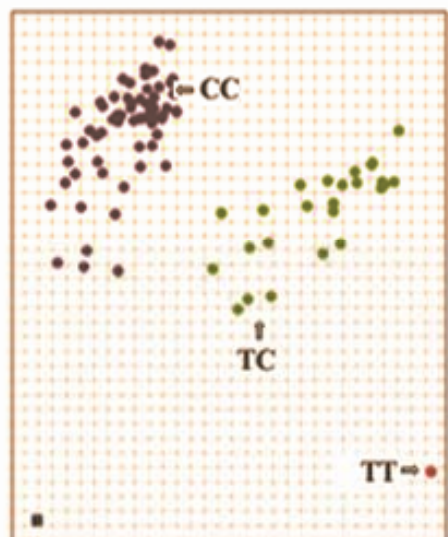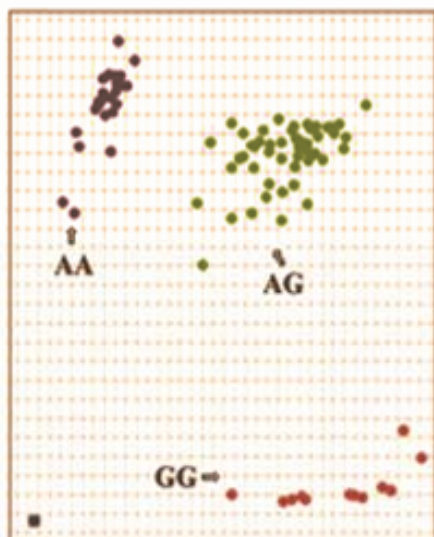

**B.**

*NFκB1* rs28362491 del/ins genotype

del/del ATTG genotype

del/ins ATTG genotype

ins/ins ATTG genotype

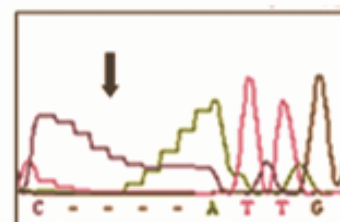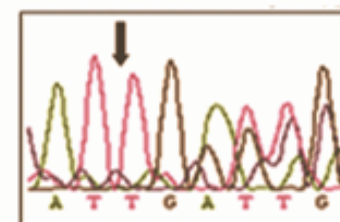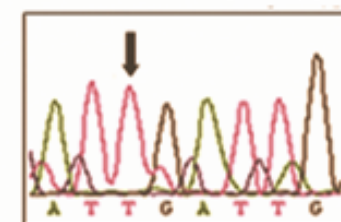

*NFκB2* rs12769316 G>A genotype

GG genotype

AG genotype

AA genotype

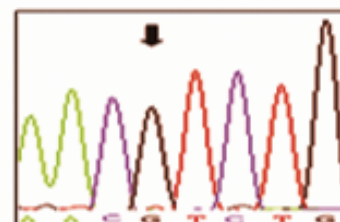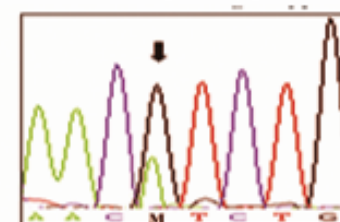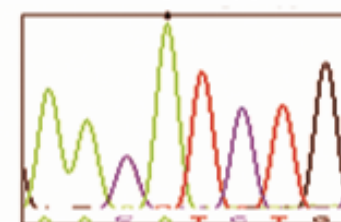

*IκBα* rs2233406 C>T genotype

CC genotype

TC genotype

TT genotype

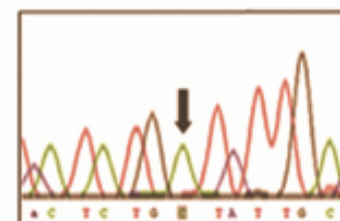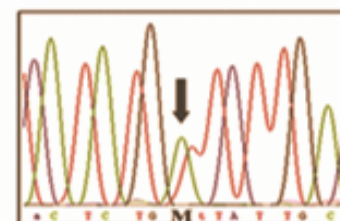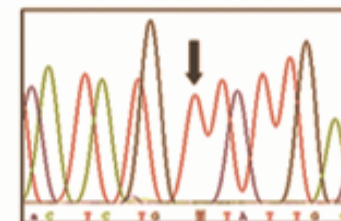

*IκBα* rs696 G>A genotype

GG genotype

AG genotype

AA genotype

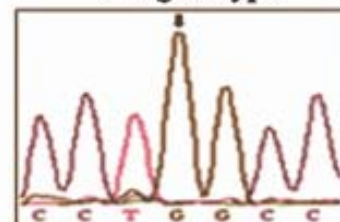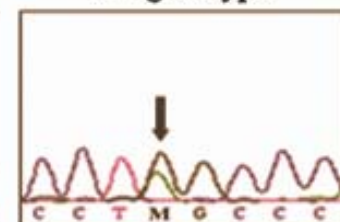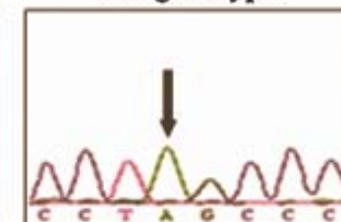

**Supplementary Table S1.** Primary information on the TaqMan assay of four SNPs in the *NFκB* and *IκBα* genes

| Gene         | Position and base change | Primers                                | Probes                                | Genotypes      |
|--------------|--------------------------|----------------------------------------|---------------------------------------|----------------|
| <i>NFκB1</i> | rs28363491 ins/del ATTG  | GCCTCCGTGCTGCCT (Forward)              | P1: FAM-TTCCCCGACC <b>ATTGG</b> -MGB  | del/del(blue)  |
|              |                          | AGGGAAGCCCCCAGGAA (reverse)            | P2: HEX-CCCGACC----ATTGATTG-MGB       | ins/ins(red)   |
|              |                          |                                        |                                       | del/ins(green) |
| <i>NFκB2</i> | rs12769316 G>A           | GCCAGTGCAGGCCTGTGATTC (Forward)        | P1: FAM-TAAAAAC <b>GTCTGGGGC</b> -MGB | G/G(blue)      |
|              |                          | CCTGCCTGGAGTCCTCCTCCCT (reverse)       | P2: HEX-AACATCTGGGGCAAGC-MGB          | A/A(red)       |
|              |                          |                                        |                                       | A/G(green)     |
| <i>IκBα</i>  | rs2233406 C>T            | CGGGAGCACAATGTAGGTCA (Forward)         | P1: FAM-CTACTCTGCTATTGCAA-MGB         | C/C(blue)      |
|              |                          | ATGTTGTAGTGGTGGTTGTGGAT (reverse)      | P2: HEX-CTACTCTGTTATTGCAAG-MGB        | T/T(red)       |
|              |                          |                                        |                                       | C/T(green)     |
| <i>IκBα</i>  | rs696 G>A                | GCTGAAAGAACATGGACTTGTATATTTG (Forward) | P1: FAM-ACTGCCT <b>GGCCCAA</b> -MGB   | G/G(blue)      |
|              |                          | GGCTGATCCTACCACAATAAGACG (reverse)     | P2: HEX-ACTGCCT <b>AGCCCAA</b> -MGB   | A/A(red)       |
|              |                          |                                        |                                       | G/A(green)     |

\* Bold nucleotide was the polymorphic site

† Three genotypes were indicated as three types of color dots in Supplementary Figure S1.

**Supplementary Table S2.** Frequency distributions of selected variables in NPC patients and controls

| Variables                | Discovery set (southern Chinese) |                           |                       | Validation set (eastern Chinese) |                          |                       |                       |
|--------------------------|----------------------------------|---------------------------|-----------------------|----------------------------------|--------------------------|-----------------------|-----------------------|
|                          | Case (n=906)<br>n (%)            | Control (n=1072)<br>n (%) | <i>P</i> <sup>a</sup> | Case (n=684)<br>n (%)            | Control (n=907)<br>n (%) | <i>P</i> <sup>a</sup> | <i>P</i> <sup>b</sup> |
| Age (years)              |                                  |                           |                       |                                  |                          |                       |                       |
| < 50                     | 396(43.7)                        | 482(45.0)                 | 0.576                 | 266(38.9)                        | 373(41.1)                | 0.368                 | 0.758                 |
| ≥ 50                     | 510(56.3)                        | 590(55.0)                 |                       | 418(61.1)                        | 534(58.9)                |                       |                       |
| Sex                      |                                  |                           |                       |                                  |                          |                       |                       |
| Male                     | 647(71.4)                        | 763(71.2)                 | 0.907                 | 484(70.8)                        | 641(70.7)                | 0.741                 | 0.961                 |
| Female                   | 259(28.6)                        | 309(28.8)                 |                       | 200(29.5)                        | 266(29.3)                |                       |                       |
| Family history of cancer |                                  |                           |                       |                                  |                          |                       |                       |
| Yes                      | 88 (9.7)                         | 83 (7.7)                  | 0.120                 | 77 (11.3)                        | 88(9.7)                  | 0.314                 | 0.720                 |
| No                       | 818(90.3)                        | 989(92.3)                 |                       | 607(88.7)                        | 819(90.3)                |                       |                       |
| Smoking status           |                                  |                           |                       |                                  |                          |                       |                       |
| Ever                     | 458(50.6)                        | 481(44.9)                 | 0.012                 | 397(58.0)                        | 456(50.3)                | 0.002                 | 0.531                 |
| Never                    | 448(49.4)                        | 591(55.1)                 |                       | 287(42.0)                        | 451(49.7)                |                       |                       |
| Drinking status          |                                  |                           |                       |                                  |                          |                       |                       |
| Ever                     | 440(48.6)                        | 245(22.9)                 | <0.001                | 339(49.6)                        | 361(39.8)                | <0.001                | <0.001                |
| Never                    | 466(51.4)                        | 827(77.2)                 |                       | 345(50.4)                        | 546(60.2)                |                       |                       |
| EBV Infection Status     |                                  |                           |                       |                                  |                          |                       |                       |
| Positive                 | 756(83.4)                        | 194(18.1)                 | <0.001                | 483(70.6)                        | 142(15.7)                | <0.001                | 0.001                 |
| Negative                 | 150(16.6)                        | 878(81.9)                 |                       | 201(29.4)                        | 765(84.3)                |                       |                       |
| Stages                   |                                  |                           |                       |                                  |                          |                       |                       |
| I                        | 51 (5.7)                         |                           |                       | 27 (3.9)                         |                          |                       |                       |
| II                       | 244(26.9)                        |                           |                       | 177(25.9)                        |                          |                       |                       |
| III                      | 377(41.6)                        |                           |                       | 316(46.2)                        |                          |                       |                       |

IV

234(25.8)

164(24.0)

---

<sup>a</sup> *P* values for  $\chi^2$  test. <sup>b</sup> *P* values of homogeneity test for the frequency of case/controls within each valuable between two datasets.
